# Supplementary material for: A ratchet-like apical constriction drives cell ingression during the mouse gastrulation EMT
Source: eLife. 2023 May 10;12:e84019. doi: 10.7554/eLife.84019 (PMC10171865; doi:10.7554/eLife.84019)
Supplement: Figure 1—source data 1. [file elife-84019-fig1-data1.xlsx]

## Sheet: Sheet1
Data source file
Figure 1F
Cells/hour	0.419355
	0.4312
	0.487179
Isolated	0.486726
	0.484848
	0.473684
2 cells	0.371681
	0.40404
	0.342105
3 cells	0.106195
	0.0808081
	0.131579
4 cells	0.0353982
	0.030303
	0.0526316
