# Supplementary material for: A ratchet-like apical constriction drives cell ingression during the mouse gastrulation EMT
Source: eLife. 2023 May 10;12:e84019. doi: 10.7554/eLife.84019 (PMC10171865; doi:10.7554/eLife.84019)
Supplement: Figure 2—source data 1. [file elife-84019-fig2-data1.xlsx]

## Sheet: Sheet1
Data source file
Figure 2A
	Time (min)	Apical surface area (µm2)
	0	43.463	46.397	57.487	79.268	19.444	54.652	48.884	40.0301	36.74	32.353	74.42	66.155	26.047	91.419	24.989	47.629	22.796	47.59	56.755	37.367	35.017	87.4239	38.5809	34.7424	29.8463	49.73	23.124	34.11	30.73	44.88	26.213	55.57	86.6	42.44	25.346
	5	42.021	45.751	52.613	76.732	18.3	51.37	40.181	37.1317	34.468	29.102	70.033	64.589	24.441	90.753	22.679	44.064	20.877	45.553	52.016	33.802	34.429	81.5095	36.5833	33.1365	21.856	45.8	19.991	33.37	23.27	38.88	21.454	53.84	79.91	38.63	14.074
	10	40.479	44.209	43.314	74.246	16.361	52.862	30.186	38.7376	31.139	29.846	63.884	54.405	24.206	86.014	21.738	39.247	16.764	43.085	50.096	31.726	31.726	77.0443	34.7032	30.473	17.5474	47.44	20.787	28.54	16.61	29.98	17.764	50.69	78.22	34.16	11.977
	15	35.158	36.949	41.623	68.775	13.874	47.74	13.178	33.959	25.655	22.953	60.633	45.005	22.522	69.132	17.117	36.035	12.064	44.534	49.94	33.136	21.817	78.846	32.1181	24.4803	12.9256	34.01	16.361	19.74	17.41	29.28	21.293	31.25	74.63	20.45	6.2508
	20	37.098	23.969	36.601	64.3	11.04	44.358	10.741	32.2356	20.955	22.483	60.359	42.537	18.723	72.227	14.336	29.846	3.6427	41.714	45.749	34.938	18.292	78.6893	33.5673	24.7936	8.42121	31.13	11.239	17.21	17.5	22.04	23.027	26.66	61.92	16.31	3.9924
	25	32.075	22.478	27.301	56.99	11.537	37.894	4.227	28.8671	10.967	19.388	60.75	32.901	12.495	78.023	15.354	28.123	4.426	39.325	43.594	30.16	16.725	62.9828	30.6297	24.0102	6.77614	31.23	9.9458	14.27	18	19.32	2.9439	29.26	55.23	0	1.6333
	30	24.566	13.228	20.488	47.193	11.189	30.384	0	24.7936	8.1079	18.644	58.518	28.71	9.6354	82.058	12.181	24.95	3.0551	36.152	31.687	27.144	19.075	68.6231	22.1693	16.3332	6.54112	22.13	6.1664	10.99	13.92	13.63	0	21.58	49.95		0
	35	15.665	12.333	6.067	38.142	8.7523	29.589		23.8536	0	12.573	52.486	18.84	8.7737	75.008	7.8729	26.595	3.3685	32.236	24.794	25.029	17.665	66.1554	18.7225	13.3956	4.15185	16.46	4.7243	5.321	10.54	7.884		14.46	40.69
	40	4.3762	13.477	3.4313	35.855	6.7134	23.721		19.6234		10.145	44.652	15.276	11.32	74.537	7.207	21.621	5.3661	28.75	22.874	27.692	14.688	66.9388	15.7065	9.98794	0	12.78	2.7848	3.73	11.59	0		7.219	17.72
	45	0	6.067	0	37.347	4.227	13.626		11.2413		5.6011	37.837	12.377	8.9304	67.37	3.486	19.545	0	26.674	16.842	27.496	12.103	56.1283	17.1166	4.50437		9.449	0	0	11.74			3.71	11.19
	50		0		36.103	0	4.8735		3.91684		4.5435	35.095	9.3613	9.0871	62.552	0	13.983		26.791	12.025	21.229	11.32	47.3938	15.824	3.64266		4.724			11.98			0	3.569
	55				31.727		3.3816		0		0	27.183	4.7394	5.9928	57.343		15.315		20.407	7.3245	18.723	11.672	36.2308	8.02952	0		2.685			11.04				0
	60				24.119		2.9837					19.976	0	5.1311	49.431		8.0687		24.48	4.5827	11.202	7.442	24.9503	6.14944			0			5.395
	65				19.842		0					16.686		5.2877	29.298		7.3245		18.879	3.3685	7.6378	4.7002	13.1606	5.24857						0
	70				11.487							14.336		0	18.879		3.0943		13.748	0	6.502	0	11.7114	3.64266
	75				6.3653							0			11.79		0		13.239		0		13.1606	0
	80				4.3762										11.359				14.375				8.34287
	85				2.934										6.502				9.5571				6.85447
	90				0										0				0				1.6059
	95																						0
Figure 2B
	Time (min)	Constriction rate (µm2/min)
	0
	5																						1.1829
	10				0.5072										0.1332				0.4074				0.893
	15				0.4973										0.9479				0.4935				-0.3603
	20				1.094										3.3763				-0.2898				0.0313
	25				0.8951							0.8774			-0.6189		0.7129		0.564		0.7129		3.1413	0.3995
	30				1.462							1.2299		0.3212	-1.1594		0.9635		0.4779	0.9479	0.4152	0.1175	-1.1281	0.376
	35	0.3978			1.9593		0.6564					0.6502		0.047	-0.8069		0.6424		0.6345	0.3839	-0.282	0.5405	0.4935	0.517
	40	0.0199			1.8101		-0.2984					0.0548	0.3133	0.3368	1.4101		1.2377		0.7834	0.0313	-0.3603	1.9819	-0.1567	-0.2898			0.7857			1.4919
	45	-1.0344			0.4575		1.0244		0.5797		0.6502	-0.0783	2.0368	0.7599	0.094		0.3447		0.6972	0.8382	0.9557	0.705	2.1621	0.5875	0.3212		-0.3282			1.3327				1.3389
	50	-0.2884	0.1293		-0.2984	0.2288	0.6763		-0.3212		-0.1488	0.4465	1.8801	1.2456	1.4336	0.4622	0.6345		0.4152	0.4309	0.6032	0.3133	1.7469	1.6921	0.5327		2.6854			-0.1591			0.3468	0.3388
	55	0.2884	0.3083	0.9747	0.2486	0.3879	1.293		0.9557		1.3787	1.2064	0.4935	0.5719	0.9635	0.188	-0.329	0.3839	-0.0235	2.3814	0.423	-0.47	2.2326	0.6894	1.1986		0.5769	0.6266	0.1492	-0.0199			0.6291	0.7178
	60	0.3083	1.4521	1.8599	0.8752	0.4973	1.5018		0.3447		0.094	1.5667	1.9271	0.1723	1.0419	0.9244	0.9949	0.8225	1.2769	1.3787	-0.5327	0.282	2.2561	0.6032	-0.0627	1.5981	-0.0199	-0.1591	0.9647	-0.0995	1.2018		3.8876	2.5406
	65	1.0642	2.5959	0.3382	1.5217	0.5669	0.1591		0.6737	0.4544	0.6189	1.3631	0.8382	-0.5092	1.5824	0.5562	0.4152	0.94	-0.8147	0.3839	0.0392	0.5954	2.3579	-0.282	0.1567	0.8617	1.8201	0.8852	1.7604	0.8155	1.7784		0.9195	1.3389
	70	-0.3879	0.2984	1.0045	0.8553	-0.0995	1.1736	1.7405	0.8147	0.6659	0.1488	0.5484	1.9741	0.4779	4.0265	-0.2037	1.1124	1.6842	1.1202	1.2064	1.2534	0.517	0.2898	0.2585	1.5354	0.9244	1.1338	1.0244	0.5072	0.6763	0.1411	0.9517	-0.5202	1.0566		2.2543
	75	1.0045	1.8499	1.8599	1.6709	0.0696	2.019	1.9991	0.188	1.0967	1.2142	1.5824	0.7129	-0.0313	2.0838	0.6345	-0.2663	-0.1567	1.0262	0.9635	0.5014	0.1567	-0.2898	1.5589	0.5875	0.9009	0.736	0.2586	0.5868	-0.2089	1.4478	0.738	1.5365	1.851	0.7622	0.4194
	80	1.5018	0.179	1.3626	1.0244	0.4873	1.7505	3.4015	0.846	0.94	0.4857	1.4414	0.5797	0.6189	1.4179	0.8617	1.4492	0.2742	0.1018	0.94	1.5041	-0.0705	0.9635	0.376	0.6815	0.329	0.6664	0.7559	0.6564	-0.0298	0.5444	-0.7057	1.4236	4.5933	0.8953	1.1453
	85	1.7803	-0.2288	2.8843	0.3978	0.4078	0.2984	0.4873	1.6764	1.9976	0.9087	0.658	0.6032	0.1723	0.0862	0.1332	0.1488	-0.0627	-0.2272	0.5484	0.7129	0.846	0.2977	0.1802	1.0967	0.047	0.9449	0.2884	1.1338	-0.0497	1.1372	-0.3468	1.4478	1.3066	2.7423	0.4517
	90	2.2577	1.4819	0.5271	0.2884	0.4973	0.0796	1.3029	1.4649	0.5719	0.2115	0.47	0.9244	-0.0313	0.9714	0.7442	0.846	-0.3995	0.9635	0.2428	0.2272	0.5484	1.0497	0.3212	0.1723	0.4779	0.4078	0.3879	0.3183	0.189	1.1493	4.0166	0.7017	1.5244	0.8267	0.4718
	95	0.8752	1.2134	0.6863	0.5868	0.8454	0.5967	0.8454	0.7834	1.6216	0.9087	2.8671	0.9479	1.0575	1.3004	0.6972	0.6189	1.0732	1.9114	0.6737	1.3004	0.94	0.3212	0.7285	0.7285	0.8304	0.5371	0.557	0.7459	1.1289	1.5768	0.5888	0.742	0.7138	3.2625	0.3267
Figure 2C
	Time (min)	Apical surface area (µm2)	Constriction rate (µm2/min)
	0	41.8222
	5	39.6838	0.42767
	10	42.2697	-0.517183
	15	42.3195	-0.0099458
	20	45.5519	-0.646478
	25	46.0492	-0.0994582
	30	46.3973	-0.0696208
	35	45.7508	0.129296
	40	44.2092	0.30832
	45	36.9487	1.45209
	50	23.9694	2.59586
	55	22.4776	0.298375
	60	13.2279	1.84992
	65	12.3328	0.179025
	70	13.4766	-0.228754
	75	6.06695	1.48193
	80	0	1.21339
Figure 2E
	Epiblast	Contraction	0.78427	0.45173	0.41223	0.36726	0.21814	0.37925	1.08416	0.17692	0.21848	0.38475	0.73358	0.57565	0.22673	0.48025	0.40536	0.29543	0.4483	0.23875	0.53075	0.1533	0.69048	0.39248	0.59129	0.20039	0.46302	0.16489	0.63781
		Expansion	0.49071	0.5537	0.47882	0.33259	0.20317	0.45504	0.55651	0.40386	0.42441	0.18894	0.81587	0.37215	0.21986	0.37272	0.18138	0.64926	0.23446	0.26233	0.27439	0.15871	0.26383	0.27919	0.25102	0.47248	0.31948	0.21642	0.35408
	Ingressing cells	Contraction	2.98996	5.2823	6.3874	4.7506	2.2157	4.6787	8.1473	5.147	2.99	3.79046	4.7953	5.6106	7.8689	6.4636	7.873	8.4889	4.2243	7.8689	6.4636	7.873	8.4889	4.2243
		Expansion	0.79567	1.1438	0	1.4919	0.4973	1.4919	0	0.8703	0.7957	0	0.4724	0	2.6314	2.6011	0	0	0	2.6314	2.6011	0	0	0
