# Supplementary material for: A ratchet-like apical constriction drives cell ingression during the mouse gastrulation EMT
Source: eLife. 2023 May 10;12:e84019. doi: 10.7554/eLife.84019 (PMC10171865; doi:10.7554/eLife.84019)
Supplement: Figure 3—source data 1. [file elife-84019-fig3-data1.xlsx]

## Sheet: Sheet1
Data source file
Figure 3B							Figure 3C					Figure 3D						Figure 3E												Figure 3F
	Time (min)	Junction lenght (µm)	Shrinkage rate (µm/min)					Cell constriction pulses	Stable phases			Time (min)	Apical surface area (µm2)	Constriction rate (µm2/min)				Time (mn)	Junction lenght (µm)											Time (mn)	Shrinkage rate (µm/min)
	0	7.33003						0.0859023	0.0605233			25	53.5085	-1.12388				30		8.35266	1.86265	2.87659	7.52133	3.00722	4.75296	2.33822	3.30674			35		0.286074	0.0637946	0.063074	0.244644	0.196874	0.00316963	-0.144622	0.1784
	5	7.14529	0.0369479					0.194323	0.0402457			30	54.6026	-0.218808				35		6.92229	1.54367	2.56122	6.29812	2.02285	4.73711	3.06133	2.41474			40		0.0554218	0.0123591	-0.0184739	0.0446001	-0.207696	-0.0955394	0.233822	-0.223
	10	8.0914	-0.189222					0.118758	0.0734316			35	51.2707	0.66637				40		6.64518	1.48188	2.65359	6.07512	3.06133	5.21481	1.89222	3.52974			45		0.244644	0.296375	0.0446001	-0.1338	-0.115326	-0.0707262	0	-0.13697
	15	8.7604	-0.1338					0.303054	-0.0210246			40	52.9118	-0.328212				45		5.42196	0	2.43059	6.74412	3.63796	5.56844	1.89222	4.21459			50		0.118496		0.296896	-0.0923697	-0.0554218	-0.0815479	0.0369479	0.0292957
	20	9.26051	-0.100022					0.722928	0.131778			45	47.7897	1.02442				50	1.26148	4.82948		0.94611	7.20596	3.91507	5.97618	1.70748	4.06811			55	-0.170748	0.0522522		0.189222	-0.0261261	0.31537	0.107674	0.107674	0.0184739
	25	10.0219	-0.152274					0.102495	-0.0230924			50	44.3086	0.696208				55	2.11522	4.56822		0	7.3366	2.33822	5.43781	1.16911	3.97574			60	0.063074	-0.0108218			-0.0554218	0.467644	0.352318	-0.386096	-0.263118
	30	10.5603	-0.107674					0.0171212	0.088453			55	37.6449	1.33274				60	1.79985	4.62233			7.6137	0	3.67622	3.09959	5.29133			65	-0.115326	-0.18157			0.519896		0.189222	-0.063074	0.18157
	35	8.9834	0.31537					0.0360423	0.0396533			60	30.2353	1.48193				65	2.37648	5.53018			5.01422		2.73011	3.41496	4.38348			70	0.286074	-0.0108218			0.063074		0.233822	-0.207696	-0.0184739
	40	8.36851	0.122978					0.074224	0.1338			65	29.4894	0.149187				70	0.94611	5.58429			4.69885		1.561	4.45344	4.47585			75	-0.0261261	0.0108218			0.698296		-0.100022	0.170748	0.223
	45	8.12966	0.0477697					0.0239398	0.0261261			70	23.8202	1.13382				75	1.07674	5.53018			1.20737		2.06111	3.5997	3.36085			80	0.215348	0.44917			0.0522522		0.412222	-0.0153043	0.3568
	50	6.01444	0.423044					0.0576631	0.0935288			75	13.6755	2.02895				80	0	3.28433			0.94611		0	3.67622	1.57685			85		-0.175231			0.189222			-0.170748	0.31537
	55	6.81407	-0.159926					0.162786	-0.0236527			80	4.92318	1.75046				85		4.16048			0			4.52996	0			90		0.0783783						0.189222
	60	6.22159	0.118496					0.245081	0.0309767			85	3.38158	0.30832				90		3.76859						3.58385				95		0.753718						0.71677
	65	4.92185	0.259948					0.735244	0.0261261			90	2.98375	0.0795666				95		0						0
	70	4.92185	0					0.107674	0.00432871			95	0	0.596749
	75	4.02985	0.1784					0.0971617	0.0578488
	80	0	0.805971					0.147049	-0.0012679
								0.100918	0.0756888
								0.155335	0.0211794
								0.336271
								0.392628
								0.0577957
								0.0503311
								0.063074
								0.0491913
								0.0556844
								0.0883036
								0.109204
								0.103979
								0.195344
								0.216469
								0.722928
