# Supplementary material for: A ratchet-like apical constriction drives cell ingression during the mouse gastrulation EMT
Source: eLife. 2023 May 10;12:e84019. doi: 10.7554/eLife.84019 (PMC10171865; doi:10.7554/eLife.84019)
Supplement: Figure 4—source data 1. [file elife-84019-fig4-data1.xlsx]

## Sheet: Sheet1
Data source file
Figure 4E
Figure 4-figure supplement 1E
Standard deviation
Crb2	0.141301	0.212695	0.200373	0.339107	0.179362	0.427763	0.630797	0.217199	0.137038	0.324094	0.364113	0.200883	0.434894	0.0913264	0.761428	0.637859	0.0828929	0.539538	0.307291	0.292091	0.125014	0.48542	0.195461	0.54753	0.709724	0.331812	0.292343	0.281761	0.216851	0.397495	0.0915048	0.152735	0.347259	0.381021	0.804643	0.750542	0.232841	0.288318	0.383204	0.406593	0.352909	0.0843452	0.594265	0.0788286	0.441257	0.236653	0.297424	0.169839	0.394459
ppMLC	0.32593	0.344505	0.314791	0.253538	0.299274	0.480015	0.162587	0.237691	0.15988	0.440307	0.363831	0.203438	0.171166	0.440045	0.191359	0.163357	0.359767	0.204178	0.206725	0.330327	0.354778	0.350952	0.436325	0.16886	0.216148	0.308027	0.257005	0.34379	0.113664	0.13031	0.211075	0.211165	0.133932	0.224576	0.197441	0.27071	0.182304	0.384918	0.37757	0.359814	0.238319	0.32112	0.376968	0.126227	0.326883	0.263992	0.211034	0.256261	0.209378
ROCK1	0.205621	0.200512	0.126921	0.307886	0.523549	0.280377	0.681014	0.514722	0.428866	0.704298	0.291858	0.390604	0.280289	0.315181	0.240707	0.194142	0.336486	0.251137	0.830628	0.583542	0.351207	0.359415	0.129576	0.293456	0.136054	0.477568	0.343624	0.194769	0.137413	0.280749	0.54498	0.157054	0.223146	0.440236	0.533482	0.418805	0.271615	0.24355	0.32041	0.540763	0.203669	0.243107	0.153227	0.348031	0.191353	0.27215	0.254317	0.442439	0.367717
ZO1	0.0622246	0.165948	0.115297	0.319476	0.392496	0.326261	0.303736	0.0671449	0.483412	0.113512	0.215499	0.226596	0.265624	0.348462	0.347858	0.184335	0.11807	0.259383	0.479861	0.16357	0.226115	0.244864	0.210244	0.332134	0.103067	0.231653	0.320077	0.236364	0.330241	0.20917	0.303084	0.136394	0.199156	0.273585	0.167052	0.284757	0.404401	0.53419	0.184135	0.246151	0.323399	0.140814	0.179021	0.180934	0.40542	0.449104	0.450156	0.245982	0.578274
PatJ	0.159452	0.227971	0.453259	0.18953	0.198055	0.16546	0.28624	0.168675	0.163202	0.20559	0.415439	0.406635	0.393002	0.32057	0.233547	0.101129	0.446972	0.503234	0.133766	0.0352847	0.450585	0.262065	0.100217	0.355037	0.0880738	0.849667	0.218639	0.150471	0.454164	0.428126	0.392363	0.207297	0.444405	0.248811	0.324838	0.211821	0.248266	0.354087	0.310799	0.402912	0.35135	0.406407	0.363665	0.4215	0.216922	0.532266	0.321945	0.353353	0.220008
F-actin	0.140953	0.225681	0.401858	0.451493	0.680006	0.238398	0.543027	0.475427	0.389839	0.451169	0.304342	0.296298	0.182856	0.275487	0.261994	0.261276	0.532384	0.22229	0.542687	0.432377	0.273065	0.312151	0.231235	0.259806	0.170858	0.491418	0.372148	0.20972	0.0316946	0.322922	0.438424	0.196821	0.215569	0.383104	0.428409	0.489166	0.306706	0.223805	0.338329	0.367935	0.187059	0.244357	0.321904	0.298689	0.185477	0.284885	0.291092	0.3882	0.288629
aPKC	0.235454	0.350029	0.295922	0.111354	0.224346	0.181672	0.169065	0.29855	0.326564	0.365772	0.329508	0.203336	0.22668	0.264139	0.198646	0.282801	0.242379	0.183746	0.127193	0.298466	0.258751	0.163482	0.354942	0.413213	0.316963	0.293658	0.132721	0.185426	0.309262	0.31899	0.336324	0.315157	0.365757	0.480808	0.219496	0.415833	0.234278	0.12664	0.459368	0.338515	0.304455	0.326025	0.367095	0.344934	0.465356	0.267089	0.187	0.259956	0.562222
pMLC	0.285105	0.376741	0.207835	0.292765	0.210644	0.0966471	0.111751	0.274316	0.171293	0.198322	0.404128	0.201235	0.208531	0.207246	0.277976	0.270589	0.240867	0.210967	0.304412	0.29221	0.316812	0.25762	0.0524089	0.120544	0.237483	0.409491	0.225625	0.107391	0.192175	0.101352	0.246697	0.292372	0.155296	0.126374	0.281837	0.172498	0.230029	0.163792	0.115236	0.203441	0.0927575	0.343613	0.315407	0.19598	0.160074	0.259631	0.139218	0.282761	0.0487435
Myo2B	0.167746	0.129707	0.311206	0.245188	0.157347	0.274381	0.104022	0.216946	0.216007	0.343678	0.122856	0.243012	0.134362	0.126362	0.17237	0.272383	0.244074	0.296976	0.288075	0.147139	0.256262	0.12676	0.204911	0.154856	0.204485	0.300316	0.206149	0.255647	0.174676	0.207043	0.212816	0.298936	0.213371	0.177305	0.102353	0.0981984	0.15821	0.210275	0.186705	0.108721	0.292112	0.162089	0.210244	0.153755	0.282777	0.206354	0.235166	0.164654	0.164492
mGFP	0.198011	0.188522	0.0713816	0.154026	0.220929	0.189223	0.203718	0.242921	0.172192	0.233746	0.135855	0.1655	0.208293	0.222489	0.214988	0.101402	0.228102	0.269459	0.107853	0.0641076	0.303013	0.212791	0.193628	0.184412	0.05098	0.119426	0.183922	0.149251	0.153093	0.0785404	0.137923	0.109885	0.133899	0.110025	0.138101	0.166936	0.123156	0.15499	0.139476	0.159197	0.262582	0.124186	0.0944514	0.307914	0.200872	0.141989	0.176896	0.148512	0.169745
Max/Min ratio
Crb2	1.41732	2.44994	1.74961	2.33176	1.97845	2.89975	4.39316	2.06191	1.48767	2.05139	3.58897	1.41401	3.39316	1.55409	3.15391	2.01425	1.36573	2.55381	2.87642	1.8752	1.89067	2.37009	1.51954	3.1461	4.5906	2.41054	2.92197	2.39633	1.61866	2.97961	1.70174	2.18376	3.6629	1.98938	2.57381	6.07483	2.15993	3.08886	3.07779	1.9467	3.32025	1.47178	3.80568	1.45707	4.07389	2.47792	2.36128	2.31201	2.49831
ppMLC	2.14138	2.26203	2.65736	2.18651	2.09686	2.18032	1.42186	1.90369	1.68991	2.74843	2.41916	1.84953	1.65426	2.52591	1.62439	1.61096	2.2195	1.77066	2.10055	2.38895	2.72448	3.10832	2.16953	1.90134	1.55008	2.68802	1.96225	1.96173	1.40589	1.43798	1.80241	1.70349	1.5838	2.20883	2.08976	1.9925	1.62692	2.7582	2.1933	2.75829	1.93132	2.2168	2.4105	1.30322	2.2115	1.82951	1.80542	2.12205	1.79016
ROCK1	1.52376	1.64482	1.34329	2.39158	2.87979	1.84242	2.94673	2.99283	2.98155	3.88522	2.22493	2.57613	1.8833	2.38503	2.09033	1.63355	2.37896	1.61408	4.1371	4.07286	2.9479	1.84388	1.30925	2.12246	1.31309	3.07428	2.42517	1.77746	1.29239	2.28535	2.87837	1.36822	1.81852	2.95865	3.5203	2.87037	2.1371	1.90921	2.12231	2.89676	1.82526	1.74954	1.47341	1.92987	1.62369	1.99485	1.95491	3.29732	2.49108
ZO1	1.20526	1.68128	1.46326	2.14329	5.66238	2.23998	2.45687	1.1875	2.33135	1.29532	1.84275	1.67192	2.26232	2.24162	2.41972	1.79078	1.59577	2.71454	3.53556	1.7812	2.07398	1.67429	1.49978	2.54194	1.33537	1.84675	2.22002	1.53844	2.0243	1.64433	1.50084	1.59051	1.59812	2.61041	1.49078	2.68169	2.91615	3.36471	1.41523	2.19953	2.66819	1.38055	1.83062	1.59995	2.11002	2.92194	3.25464	2.05996	3.85895
PatJ	1.25486	2.13439	4.56313	1.81976	2.44422	1.45927	1.72254	1.48348	1.95179	1.7839	1.96247	2.12373	3.26508	2.31641	2.44665	1.24303	3.61295	2.0742	1.39142	1.09967	4.54661	1.88972	1.37463	2.22401	1.34319	7.24432	1.66336	1.64347	2.96067	2.61948	2.83747	2.02858	2.86702	2.25208	1.63912	2.05952	2.24861	2.34007	1.73375	2.76672	2.73413	2.03743	2.65374	2.57971	1.67652	2.31599	2.13623	2.22508	1.63975
F-actin	1.45969	1.83249	2.64896	3.0245	3.47454	1.90954	2.73585	2.81394	2.98278	2.64882	2.25136	1.82425	1.6932	1.87674	2.17433	2.14657	3.42044	1.52872	2.90334	3.27541	1.88932	1.78647	1.55308	1.74177	1.35661	2.8095	3.00594	1.74493	1.08531	2.27564	2.55801	1.47763	1.80872	2.69135	2.66523	2.96622	2.07911	1.82035	2.80802	2.30181	1.77491	2.31453	2.10348	1.74929	1.56514	1.91537	2.56007	2.59269	2.57391
aPKC	2.11613	2.22489	2.37127	1.30121	1.84539	1.47954	1.4627	2.63697	1.97292	1.83268	2.04437	1.78194	1.79339	2.2124	1.81967	1.87196	1.53362	1.46924	1.27841	1.95535	2.28215	1.61509	1.85316	2.65117	2.19937	1.64516	1.24203	1.49681	1.89148	1.94668	2.40096	1.96497	2.55855	2.93177	1.82117	3.07074	1.46231	1.42977	2.65094	2.1254	1.94162	1.92889	2.76018	2.08623	2.74521	2.06712	1.7272	1.55711	2.53113
pMLC	1.51615	2.13927	1.66898	2.16329	1.85039	1.27388	1.21429	1.86717	1.64326	1.49815	2.01893	1.56635	1.7848	1.5004	2.17628	1.80316	1.7685	1.562	2.29301	1.78446	2.64793	1.68209	1.13058	1.36059	1.75374	2.98692	2.05259	1.33258	1.6032	1.3747	1.78483	2.09809	1.54695	1.35285	1.50557	1.62101	1.98501	1.44105	1.21046	1.76005	1.29971	2.12307	2.2937	1.61914	1.56536	1.59226	1.41808	2.09235	1.12215
Myo2B	1.58137	1.64551	2.02543	2.05255	1.72216	2.03643	1.36559	1.58211	1.60058	2.78999	1.47177	1.66848	1.39151	1.54745	1.52907	1.85518	2.01348	1.77926	2.37339	1.63531	2.13586	1.28626	1.5791	1.4745	1.54315	2.17064	2.18273	1.85675	1.67477	1.93199	2.14198	2.43416	2.11723	1.63959	1.24791	1.33163	1.57019	2.03204	1.65834	1.30248	2.4025	1.5162	2.04341	1.65845	2.08344	1.88213	1.51047	1.47815	1.52265
mGFP	1.81113	1.79123	1.23093	1.74652	1.5921	1.69316	1.87757	1.84206	1.75908	1.8607	1.29451	1.59687	1.64855	1.54455	1.52552	1.27544	1.89147	1.80866	1.30391	1.23446	1.9816	1.88591	1.7168	1.62892	1.11677	1.48649	1.82237	1.52854	1.50793	1.18975	1.39278	1.32672	1.48245	1.27706	1.43278	1.5763	1.46548	1.50622	1.58748	1.62715	1.89479	1.39854	1.33384	2.12954	1.64354	1.37524	1.58287	1.50573	1.76803
[truncated: 783 more columns]
