# Supplementary material for: A ratchet-like apical constriction drives cell ingression during the mouse gastrulation EMT
Source: eLife. 2023 May 10;12:e84019. doi: 10.7554/eLife.84019 (PMC10171865; doi:10.7554/eLife.84019)
Supplement: Figure 5—source data 1. [file elife-84019-fig5-data1.xlsx]

## Sheet: Sheet1
Data source file
Figure 5
Figure 5-figure supplement 1 AND 2
	Junction mean intensity
	ppMLC Alexa 488	0.206244	0.502501	0.359259	0.517077	0.163645	0.268809	0.116272	0.219496	0.738898	0.28168	0.384461	0.746439	0.370893	0.271254	0.240402	0.127459	0.249019	0.223245	0.564388	0.158752	0.227747	0.528857	0.195048	0.264273	0.176887	0.184857	0.26398	0.469773	0.391443	0.0961256	0.113543	0.171589	0.317494	0.257461	0.179257	0.329783	0.290907	0.120846	0.267089	0.170845	0.0906684	0.500801	0.254628	0.397633	0.182203	0.27595	0.159336	0.250905
	ppMLC Alexa 647	0.146515	0.478018	0.357057	0.520798	0.177131	0.30465	0.129414	0.223645	0.759561	0.285042	0.383662	0.803382	0.437703	0.319163	0.260071	0.131335	0.277408	0.215108	0.537567	0.16156	0.248073	0.492441	0.201485	0.363795	0.154045	0.172762	0.281725	0.537996	0.382209	0.0932557	0.139466	0.187468	0.294234	0.253081	0.188536	0.280726	0.313451	0.134411	0.294726	0.176052	0.0866178	0.490494	0.236118	0.323802	0.172439	0.254769	0.161828	0.253849
	ZO1	0.899049	0.558844	1.93465	1.31956	1.71238	2.49012	1.26483	1.21665	0.785019	1.22938	1.15387	0.892183	1.30681	0.995343	0.987845	2.0843	1.09704	0.792629	0.52775	1.65215	1.60748	0.794906	1.43812	1.66914	0.712373	1.64724	2.43178	1.71694	1.56657	1.238	1.87634	1.10016	0.757389	0.702336	0.76975	0.619198	1.26298	0.825855	0.674929	0.487689	0.90303	2.11796	1.49487	1.31292	0.812905	0.623246	0.516446	0.737832
	aPKC	0.993414	0.616344	1.58145	1.27328	1.59826	1.95227	1.2495	1.12194	0.830362	1.03649	1.06599	0.873901	1.30806	1.01891	0.962555	1.51043	1.08957	0.823765	0.597769	1.48982	1.41884	0.898012	1.32567	1.44906	0.809675	1.46648	2.14528	1.54409	1.55885	1.11543	1.55013	0.988609	0.790335	0.758245	0.794534	0.612986	1.016	0.830578	0.620377	0.533913	0.894779	1.80472	1.37996	1.15645	0.816505	0.674556	0.650805	0.847609
	ppMLC	0.951255	1.01372	0.773338	0.574483	1.19553	1.36018	0.549445	0.604796	1.03773	0.964718	2.3774	1.60389	0.829877	0.859353	0.963081	0.838557	0.92222	2.03096	1.01697	0.898517	0.704031	0.890292	1.48032	1.07114	0.688873	1.28154	1.1091	0.527186	0.74744	0.640756	0.60435	0.641622	0.9714	1.02991	1.0809	1.16465	0.937842	0.744987	1.02001	1.53731	1.50731	1.39052	0.527802	0.553919	1.14561	1.85298	0.608821	0.405175
	ROCK1	1.19439	1.21442	0.83562	0.897406	1.22223	1.3393	0.936344	0.732275	1.14455	1.29115	1.7555	1.23166	1.03431	1.12558	1.18122	1.20696	0.925274	1.26514	1.77205	1.28671	0.948585	0.954357	1.14925	1.34878	0.77778	1.36172	1.07485	0.901873	0.792095	0.916901	0.808302	1.03748	1.29443	1.32951	1.21149	1.2153	1.07235	0.619246	0.876964	1.48098	1.15686	1.87269	0.650286	0.726925	1.76214	2.38185	0.847023	0.588787
	F-Actin	0.954796	1.33343	0.750061	0.842871	1.20609	1.07759	0.765884	0.789266	1.31982	1.01386	1.45389	1.04272	0.940436	0.915819	0.936839	0.810171	1.02746	1.87411	2.00906	1.02844	0.959119	0.940894	1.06187	1.12414	0.863119	1.49775	1.07143	0.651169	0.641805	0.677575	0.711403	1.11764	1.19326	1.05845	1.79487	1.47262	1.32091	0.681271	1.08847	1.45878	1.94114	2.13662	0.614938	0.631613	1.69327	1.94629	0.789545	0.601744
	Myosin2B	0.988823	1.46488	0.851351	0.916268	0.959284	1.12919	1.19022	0.613423	0.815258	0.783636	1.04013	0.736091	0.61638	0.909896	0.94709	0.659946	0.611819	0.748305	0.841289	1.14443	3.1535	1.42628	0.700384	0.637528	0.787692	0.919428	1.3166	0.703657	0.456927	0.68591	1.05025	1.29725	0.870771	0.782484	0.799169	0.797676	0.943798	0.637541	0.86284	0.613489	0.682113	0.818025	0.835639	0.657212	0.777386	0.646781	0.799545	0.955835
	Crb2	0.536738	0.793444	0.573095	0.835293	1.09338	0.508703	1.30753	0.914834	0.864648	1.79837	1.31897	0.71526	0.925768	0.544609	0.814656	0.530195	0.490052	0.472715	0.839516	0.581871	2.44663	1.39968	0.872001	0.611076	1.21875	1.51318	1.34205	0.739066	0.686676	0.597785	0.778451	0.7374	0.876849	0.344679	0.43328	0.880243	1.11072	1.6858	0.563215	0.485581	0.424725	0.666055	1.33104	0.49769	0.644542	0.51164	0.476177	0.617558
	PatJ	0.175303	0.122657	0.304857	0.143521	0.22178	0.270761	0.163093	0.21202	0.134511	0.283247	0.306149	0.286575	0.4353	0.211965	0.316399	0.166277	0.222108	0.302683	0.284311	0.32612	0.299081	0.780922	0.268063	0.161758	0.750767	0.260799	0.485433	0.190214	0.42116	0	0.356584	0.0343883	0.213281	0.17889	0.217851	0.219235	0.249256	0.257081	0.327877	0.290804	0.28642	0.288932	0.276882	0.139004	0.0609198	0.347524	0.548538	0.1673
	pMLC	0.372293	0.752851	0.748287	0.214455	0.432752	0.485782	0.0614754	0.300355	0.193185	0.351508	0.37243	0.168456	0.715393	0.61298	0.852224	0.192442	0.643884	0.477026	0.78898	0.575812	0.212966	0.314748	0.586583	0.60626	0.54953	0.710352	0.734998	0.78399	0.441347	0.599217	0.346652	0.62187	0.404155	0.37455	0.501069	0.312284	0.564821	0.740258	0.557644	0.290601	0.5096	0.332684	0.277376	0.575768	0.207967	0.371358	0.290655	0.432913
[truncated: 2,401 more columns]
