# Supplementary material for: A ratchet-like apical constriction drives cell ingression during the mouse gastrulation EMT
Source: eLife. 2023 May 10;12:e84019. doi: 10.7554/eLife.84019 (PMC10171865; doi:10.7554/eLife.84019)
Supplement: Figure 6—source data 1. [file elife-84019-fig6-data1.xlsx]

## Sheet: Sheet1
Data source file
Figure 6D
	WT E7.5	38.5919	32.8261	6.38831	26.6343	45.7992	18.6735	19.1977	9.59884	5.76586	20.8357	33.2192	16.2492	42.3266	39.6075	32.8588	46.0941	42.9491	4.42267	9.92645	42.8836	27.8137	9.33676	10.2868	49.4357	4.58648	21.0323	24.9635	5.37273	12.5145	19.3615	4.52096	14.0215	5.92966	44.2923	41.1145	43.7353	67.4212	6.94524	17.8873	5.17617	23.8824	10.0575	27.2895	29.2224	8.94363	47.8304	22.1134	20.7702
	Crb2-/- E7.5	15.1798	51.6577	9.16677	6.24434	28.068	61.0557	8.34681	5.97102	20.1417	57.6708	47.0533	21.7816	33.198	19.7001	6.16024	42.8484	60.1727	22.0339	33.7026	47.3056	60.7193	4.79363	56.178	56.2411	7.52684	29.9602	5.92897	9.50317	49.4291	19.2797	34.6908	18.5228	9.67136	53.613	11.2272	15.4111	21.4032	41.4187	11.1851	33.9549	31.7894	24.662	3.21678	12.741	17.2192	9.73444	49.0506	52.3725
	WT E8	8.64878	21.5237	36.7901	45.7992	51.7289	29.55	21.1633	21.7202	39.7713	29.3535	16.7406	24.5377	11.2041	46.9131	28.0758	20.0822	51.8927	15.6923	17.5269	26.274	33.4158	13.0715	23.6204	7.99357	12.0559	37.8384	46.52	39.5092	46.8148	10.5817	21.5237	32.4657	27.4533	27.8465	34.071	64.7348	22.9979	5.56929	29.2552	13.0715	20.0167	19.5908	49.9926	12.2524	20.934	11.3351	38.6902	34.89
	Crb2-/- E8	10.106	18.6438	20.2701	19.9216	3.2525	7.31813	2.43938	7.66661	10.3964	17.4822	6.85348	9.29286	7.08581	3.19442	24.2195	15.6817	6.04036	9.35094	10.3383	2.72978	6.7954	11.7903	26.0781	11.4418	2.3813	2.09089	28.2851	3.02018	2.9621	29.0402	29.0402	19.0504	5.57572	5.86612	11.7322	14.4039	1.80049	5.11107	5.16915	33.8028	4.87875	3.19442	28.2271	6.62116	33.977	19.1084	12.8358	5.34339
Figure 6E
	WT E7.5	0.314271	0.311733	0.466357	0.378636	0.221565	0.415554	0.493917	0.320928	0.265207	0.285735	0.0670722	0.542127	0.15939	0.142325	0.286223	0.306571	0.206348	0.257561	0.382724	0.373986	0.287572	0.283303	0.0941278	0.206021	0.44845	0.407225	0.264201	0.387753	0.360672	0.409051	0.350786	0.179035	0.489995	0.109202	0.550439	0.271398	0.28994	0.35944	0.0986773	0.378629	0.285816	0.266716	0.223692	0.273387	0.518471	0.248303	0.259384	0.279962
	Crb2-/- E7.5	0.41436	0.318251	0.59822	0.131946	0.181031	0.153985	0.204296	0.498896	0.218081	0.0945184	0.0449331	0.157344	0.299565	0.0234772	0.496059	0.1552	0.211996	0.181296	0.412115	0.245239	0.215932	0.677411	0.166902	0.233384	0.328894	0.244024	0.352077	0.609324	0.131411	0.488924	0.0692763	0.633804	0.263044	0.343998	0.670898	0.270095	0.190076	0.355357	0.0766823	0.407382	0.26443	0.5597	0.274931	0.197289	0.241346	0.254343	0.277444	0.355721
	WT E8	0.443442	0.20001	0.455782	0.385369	0.334875	0.183255	0.162375	0.318718	0.493096	0.579375	0.540564	0.517769	0.461724	0.568412	0.3695	0.382876	0.552869	0.568458	0.0608947	0.370586	0.473073	0.48035	0.40458	0.563569	0.62385	0.287497	0.640901	0.147688	0.305259	0.566941	0.0988073	0.551441	0.415234	0.167453	0.479616	0.16088	0.666534	0.278917	0.447166	0.372411	0.418104	0.316716	0.520321	0.560781	0.161805	0.566262	0.614564	0.452945
	Crb2-/- E8	0.375268	0.227194	0.0741987	0.189342	0.447003	0.114661	0.155312	0.21326	0.346395	0.206037	0.322028	0.108715	0.383792	0.203729	0.180913	0.256956	0.119184	0.259723	0.155637	0.349046	0.286626	0.301684	0.300754	0.12022	0.106234	0.548975	0.159053	0.114929	0.371818	0.15566	0.0824172	0.195162	0.274178	0.361552	0.163514	0.217943	0.276664	0.226978	0.216663	0.267448	0.237365	0.304916	0.0835036	0.0304902	0.285163	0.177986	0.360301	0.266326
[truncated: 1,139 more columns]
