# Supplementary material for: A ratchet-like apical constriction drives cell ingression during the mouse gastrulation EMT
Source: eLife. 2023 May 10;12:e84019. doi: 10.7554/eLife.84019 (PMC10171865; doi:10.7554/eLife.84019)
Supplement: Figure 7—source data 1. [file elife-84019-fig7-data1.xlsx]

## Sheet: Sheet1
Data source file
Figure 7B
	ppMLC WT	0.963117	1.47643	2.27177	1.97226	1.40666	1.81924	1.80852	2.34333	1.77778	1.54316	1.55832	1.94318	1.66542	0.786305	2.44586	2.00497	1.52167	1.40183	1.80807	1.69747	1.91273	1.85945	2.20709	2.3356	1.05362	1.90856	2.09644	1.88473	1.81254	1.56425	1.76789	2.12331	2.30448	2.46728	1.96533	1.35856	1.47155	1.62561	1.70973	1.56813	1.21985	1.59497	2.37223	2.48704	2.23847	1.98481	2.22275	1.75591
	ppMLC Crb2-/-	0.657668	1.77074	1.40948	1.81202	1.62978	1.56767	1.2001	1.59176	1.8943	1.40421	1.28861	1.6508	1.67759	1.24412	1.02983	2.0446	1.19059	1.16513	1.28918	1.09724	1.81574	1.31127	1.53399	1.28969	1.80041	1.57111	1.79733	1.16383	1.6301	1.56361	1.69859	3.1232	1.68648	1.22907	1.66276	1.67761	1.71448	2.80358	1.0532	1.51561	1.88427	2.50328	1.68942	1.61483	2.30127	0.926068	1.90771	0.935083
	F-actin junctional WT	0.931059	0.812265	1.24781	1.00184	1.00584	1.05276	1.49262	1.26635	0.991084	1.88305	0.61527	0.875532	0.898484	1.24323	1.2098	0.791554	1.60712	1.7613	0.867226	1.02209	1.00072	1.3861	1.12458	1.63466	1.53775	1.12394	0.839775	1.35566	0.950935	1.20193	1.24576	1.65271	0.935562	1.45925	1.42317	1.83303	1.07199	1.36521	1.41184	1.43109	1.21994	1.15557	3.07007	0.651851	0.869348	1.45406	1.62383	0.934888
	F-actin junctional Crb2-/-	1.17889	1.22197	1.21042	0.891024	1.23404	1.04844	1.11816	1.57496	1.19189	1.57403	1.07724	1.47597	1.16869	1.24456	1.41696	0.897792	0.871122	0.926048	0.808286	1.45566	1.12077	1.67172	1.39736	1.19722	1.26219	1.27107	1.28327	1.55126	1.10671	1.28188	0.843794	1.36311	1.30624	1.57406	2.2923	0.990167	1.14054	1.45266	1.13406	1.25766	1.20633	0.969598	1.07838	1.38554	1.16951	1.30584	1.28236	0.905729
	F-actin medial WT	0.638261	0.257842	0.461196	0.411174	0.382124	0.582494	0.775541	0.733522	0.363344	0.737689	0.363933	0.475621	0.432304	0.433707	0.484689	0.301133	0.662624	0.576186	0.562517	0.328675	0.324638	0.453724	0.603936	0.975099	0.79322	0.429391	0.331484	0.496925	0.337393	0.564739	0.600715	0.589674	0.472899	0.187007	0.729827	1.19038	0.370329	0.828539	0.494765	0.472864	0.381567	0.591881	0.555985	1.17326	1.00182	0.677112	0.90223	0.478384
	F-actin medial Crb2-/-	0.682189	0.74283	0.576412	0.42377	0.830296	0.416413	0.657814	0.813684	0.810739	0.801377	0.52564	0.810333	0.746246	0.373095	0.628264	0.503876	0.522202	0.440086	0.420649	1.08245	0.527281	0.608247	0.783021	0.47505	0.798088	0.740225	0.906719	1.10882	0.48562	0.687886	0.405791	0.763501	0.663261	0.811442	2.38221	0.463343	0.725914	0.694903	0.611353	0.584547	0.673183	0.490895	0.751597	0.921786	0.857799	0.865601	0.742849	0.377747
Figure 7C
	aPKC WT	2.51114	2.14358	1.76168	1.70125	2.46663	2.07241	1.91758	2.30466	1.60153	1.38776	2.30207	2.47287	1.77356	2.11449	2.33546	1.81252	1.70897	1.604	1.5977	1.88041	2.16556	1.7241	1.83187	2.24688	1.79233	1.49984	1.42424	1.89816	1.65233	1.92512	1.24322	2.21705	1.49665	1.78097	2.06432	2.03981	1.98594	2.4353	1.97014	1.85492	2.50763	1.68454	2.40684	1.92346	2.00049	2.22988	2.276	2.05095
	aPKC Crb2-/-	0.989053	1.05048	1.05459	1.15776	1.07731	1.09379	1.01746	0.95012	1.09113	0.95265	1.24001	1.07165	1.15037	0.96616	1.12729	1.12115	1.0623	1.00497	1.00127	1.05695	0.958338	1.16437	1.10312	1.06502	1.18732	1.14733	0.808155	1.08326	1.07467	0.99508	1.17696	1.0899	1.20212	0.997622	0.954761	0.961184	1.01318	1.12311	1.00707	1.15827	1.3236	1.01318	1.09833	1.08259	1.08282	1.07411	1.09738	1.19446
	Rock1 WT	1.27744	1.65855	1.54023	1.39275	1.32132	1.3685	1.15676	1.08207	1.45567	1.00199	1.07783	1.59379	1.10001	1.33798	1.30355	0.993781	1.68931	1.01213	1.46687	1.31493	1.32274	1.33137	1.12968	1.12374	1.15899	1.63649	1.47725	1.16696	0.958746	1.44927	1.59655	1.47969	1.70422	1.19517	1.40837	1.17905	1.34529	1.10935	1.22951	1.44307	2.00388	1.07354	0.637247	1.14435	1.1685	1.25403	1.01742	1.04745
	Rock1 Crb2-/-	1.11804	1.18794	1.1362	1.19987	1.10489	0.973364	1.11674	1.09989	1.16853	1.14507	1.15891	1.26263	1.38264	1.25019	1.07067	1.12589	1.11423	1.18146	1.45717	1.11567	1.04546	1.17321	1.08187	1.19191	1.06341	1.21547	1.2022	1.13816	1.18174	1.02644	1.06272	0.831002	0.913305	0.887391	1.15531	1.3305	1.07693	1.20501	1.06171	1.26841	1.17509	1.08321	1.27943	1.06572	1.11611	1.09936	0.974752	1.21768
[truncated: 625 more columns]
