# Supplementary material for: A ratchet-like apical constriction drives cell ingression during the mouse gastrulation EMT
Source: eLife. 2023 May 10;12:e84019. doi: 10.7554/eLife.84019 (PMC10171865; doi:10.7554/eLife.84019)
Supplement: Supplementary file 1. [file elife-84019-supp1.xlsx]

## Sheet: Sheet1
Supplementary file 1
Details on n values, means and p values
Figure	Panel	n	Mean ± s.e.m.	p value
1	F	3 embryos, 378 cells	cells/h: 44±2.1	N/A
			isolated: 48±1.1
			2 cells: 37±1.7
			3 cells: 11±1.5
			4 cells: 4±0.9
2	A,B	4 embryos, 41 cells	N/A	N/A
	E	Epi 4 embryos, 49 cells	Contraction: 0.4335±0.04267	Epi contraction vs expansion: p=0.3019
			Expansion: 0.3624±0.03057
		Ingressing cells 4 embryos, 41 cells	Before constriction, contraction: 0.3333±0.08569	Before constriction, contraction vs expansion: p=0.2571
			Before constriction, expansion: 0.5516±0.1270	During constriction, contraction vs expansion: p<0.0001
			During constriction, contraction: 1.079±0.09281	Contraction before vs contraction during: p<0.0001
			During constriction, expansion: 0.1505±0.04256	Expansion before vs expansion during: p=0.010
3	C	3 embryos, 51 junctions	Constriction pulses: 0.1853±0.03509	p=0.00016
			Stable phases: 0.04393±0.01093
2,3 S1	B,C	4 embryos, 41 cells	N/A	N/A
	D	Epi 4 embryos, 49 cells	Contraction: 48.30±2.546	Epi contraction vs expansion: p=0.2031
			Expansion: 51.70±2.548
		Ingressing cells 4 embryos, 41 cells	Before constriction, contraction: 42.26±6.391	Before constriction, contraction vs expansion: p=0.0941
			Before constriction, expansion: 57.74±6.391
			During constriction, contraction: 89.00±1.929	During constriction, contraction vs expansion: p<0.0001
			During constriction, expansion: 11.00±1.929
	E	Epi 4 embryos, 49 cells	N/A	N/A
	F,G,J-L	4 embryos, 41 cells	G, 1.364±0.08880
4 4 S1	C E	Crb2, 3 embryos, 393 cells, 1933 junctions	SD: 0.3347±0.009780 Max/Min: 2.174±0.05390	Crbs2 vs mGFP: SD, p<0.0001 Max/Min, p<0.0001
		ppMLC, 3 embryos, 372 cells, 1850 junctions	SD: 0.3336±0.009517 Max/Min: 2.480±0.06065	ppMLC vs mGFP: SD, p<0.0001 Max/Min, p<0.0001
		ROCK1, 3 embryos 199 cells, 1005 junctions	SD: 0.3192±0.01148 Max/Min: 2.392±0.07492
		ZO1, 5 embryos, 612 cells, 3072 junctions	SD: 0.3084±0.005439 Max/Min: 2.257±0.03157	ZO1 vs mGFP: SD, p<0.0001 Max/Min, p<0.0001
		PatJ, 3 embryos, 241 cells, 1207 junctions	SD: 0.2752±0.01087 Max/Min: 2.069±0.04934
		F-actin, 3 embryos, 199 cells, 1005 junctions	SD: 0.2617±0.007563 Max/Min: 2.059±0.04196
		aPKC, 4 embryos, 458 cells, 2308 junctions	SD: 0.2418±0.004785 Max/Min: 1.846±0.02159	aPKC vs mGFP: SD, p=0.0021 Max/Min, p=0.0486
		pMLC, 3 embryos, 241 cells, 1228 junctions	SD: 0.2279±0.005621 Max/Min: 1.857±0.02789
		Myo2B, 5 embryos, 832 cells, 4135 junctions	SD: 0.2202±0.002881 Max/Min: 1.738±0.01790	Myo2B vs mGFP: SD, p=0.0308 Max/Min, p=0.1914
		mGFP, 3 embryos, 76 cells, 407 junctions	SD: 0.1771±0.007483 Max/Min: 1.618±0.03082
5 5 S1		Ctl ppMLC 3 embryos, 1359 junctions	Correlation coefficient 0.9599±0.009950	Ctl vs ppMLC-ROCK1: p=0.0159
		ZO1 vs aPKC 3 embryos, 1388 junctions	Correlation coefficient 0.9480±0.02043	Ctl vs ppMLC-F-Actin: p=0.0031
		ppMLC vs ROCK1 3 embryos, 711 junctions	Correlation coefficient 0.7166±0.01306	ppMLC-ROCK1 vs Myo2B-Crb2: p<0.0001
		F-Actin vs ROCK1 3 embryos, 711 junctions	Correlation coefficient 0.6923±0.02893	ppMLC-ROCK1 vs pMLC-PatJ: p<0.0001
		ppMLC vs F-Actin 3 embryos, 711 junctions	Correlation coefficient 0.6453±0.01661	ppMLC-F-Actin vs Myo2B-Crb2: p=0.0002
		ZO1 vs ppMLC 3 embryos, 810 junctions	Correlation coefficient 0.3514±0.02572	ppMLC-F-Actin vs pMLC-PatJ: p<0.0001
		aPKC vs ppMLC 3 embryos, 528 junctions	Correlation coefficient 0.2658±0.04749	Myo2B-Crb2 vs pMLC-PatJ: p=0.3184
		Myo2B vs Crumbs2 3 embryos, 2453 junctions	Correlation coefficient 0.2013±0.05725
		pMLC vs PatJ 3 embryos, 736 junctions	Correlation coefficient 0.09421±0.04905
5 S3	A,B	2 embryos, 95 cells, 526 junctions	B, F-Actin vs ppMLC: 0.6803 F-Actin vs Rock1: 0.7490 ppMLC vs Rock1: 0.7198	N/A
	C,D	3 embryos, 585 cells, 2453 junctions	D, 0.05517	N/A
	E,F	3 embryos, 240 cells, 736 junctions	F, -0.02749	N/A
6	D	WT E7.5: 5 embryos, 1187 cells	23.08±0.4096	E7.5 WT vs Crb2-/- : p=0.0622
		Crb2-/- E7.5: 3 embryos, 334 cells	25.12±0.7298	E8 WT vs Crb2-/- : p<0.0001
		WT E8: 4 embryos, 880 cells	23.75±0.4767	Crb2-/- E7.5 vs Crb2-/- E8: p<0.0001
		Crb2-/- E7.5: 3 embryos, 429 cells	12.01±0.3745
	E	WT E7.5: 5 embryos, 1187 cells	0.2890±0.004351	E7.5 WT vs Crb2-/- : p=0.8726
		Crb2-/- E7.5: 3 embryos, 334 cells	0.2930±0.008131	E8 WT vs Crb2-/- : p=0.0003
		WT E8: 4 embryos, 880 cells	0.2974±0.004915	Crb2-/- E7.5 vs Crb2-/- E8: p=0.0149
		Crb2-/- E7.5: 3 embryos, 429 cells	0.2619±0.006781
7	B	ppMLC WT: 4 embryos, 673 cells	1.918±0.03372	ppMLC: p<0.0001
		ppMLC Crb2-/-: 3 embryos, 484 cells	1.361±0.02381
		F-actin WT: 3 embryos, 230 cells	Junctional: 1.464±0.03930 Medial: 0.6010±0.01747	Junctional: p=0.003 Medial: p=0.0140
		F-actin Crb2-/-: 3 embryos, 122 cells	Junctional: 1.227±0.01968 Medial: 0.6636±0.02137
	C	aPKC WT: 3 embryos, 673 cells	1.858±0.01571	aPKC: p<0.0001
		aPKC Crb2-/-: 3 embryos, 622 cells	1.104±0.01098
		Rock1 WT: 3 embryos, 400 cells	1.712±0.04908	Rock1: p<0.0001
		Rock1 Crb2-/-: 3 embryos, 310 cells	1.270±0.01186
	D	Rock1 Crb2-/-: 3 embryos, 122 cells, 658 junctions	SD: 0.2717±0.008462 Max/Min: 2.073±0.05036	SD: p=0.0100 Max/Min: p=0.0018
		ZO1 Crb2-/-: 3 embryos, 501 cells, 2478 junctions	SD: 0.2686±0.005113 Max/Min: 2.037±0.03603	SD: p<0.0001 Max/Min: p<0.0001
		F-actin Crb2-/-: 3 embryos, 414 cells, 1992 junctions	SD: 0.2477±0.005699 Max/Min: 1.915±0.02890	SD: p=0.1799 Max/Min: p=0.0387
		aPKC Crb2-/-: 3 embryos, 83 cells, 358 junctions	SD: 0.2106±0.01271 Max/Min: 1.556±0.03351	SD: p=0.0402 Max/Min: p=0.0067
		Myo2B Crb2-/-: 3 embryos, 232 cells, 1172 junctions	SD: 0.2098±0.005469 Max/Min: 1.153±0.05415	SD: p=0.4029 Max/Min: p<0.0001
6 S1	C	WT: 4 embryos, 1115 cells	1.925±0.01008	p<0.0001
		Crb2-/-: 3 embryos, 986 cells	1.522±0.03141
